# Supplementary material
Source: MDPI journal article supplement (https://www.mdpi.com/2073-4441/15/3/509)
Supplement: s1 [file s1]

## Supplementary Materials

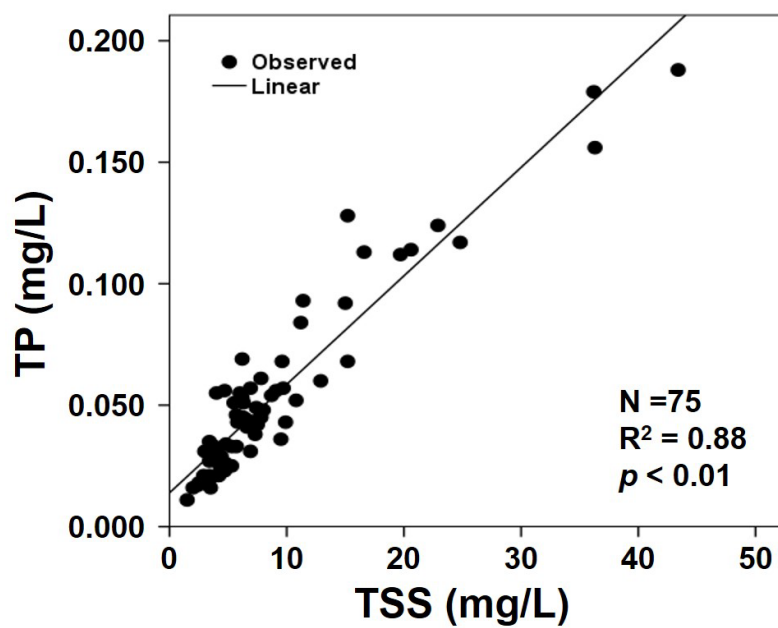

Figure S1. Regression analysis between TSS and TP during the wet season.

**Table S1.** Information on the analytical methods and instruments.

| Parameter          | Analytical method                                                  | Analytical instrument                                                                                           |
|--------------------|--------------------------------------------------------------------|-----------------------------------------------------------------------------------------------------------------|
| BOD                | Azide modification of Winkler method<br>(5 d, incubation, 20 °C)   | 5100 DO Instrument (YSI Inc., Yellow Springs, OH, USA),<br>Incubator VS-3250Di (VISION Scientific, South Korea) |
| COD                | Potassium permanganate method<br>(KMnO <sub>4</sub> , 100 °C Acid) | J-BS3D Water Bath (JISICO Corp., South Korea)                                                                   |
| TOC                | High temperature combustion oxidation                              | TOC-LCPH (SHIMADZU Corp., Kyoto, Japan)                                                                         |
| TSS                | Gravimetric                                                        | 47 mm GF/C Filter (Whatman, Maidstone, UK)                                                                      |
| TN                 | Continuous flow analysis                                           | AACS_VI (BLTEC Corp., Tokyo, Japan)                                                                             |
| NH <sub>3</sub> -N | Continuous flow analysis                                           | AACS_VI (BLTEC Corp., Tokyo, Japan)                                                                             |
| NO <sub>3</sub> -N | Smart Chem wet chemistry analysis                                  | Smart Chem 200 (AMS Alliance Corp., Westborough, MA, USA)                                                       |
| TP                 | Continuous flow analysis                                           | AACS_VI (BLTEC Corp., Tokyo, Japan)                                                                             |
| PO <sub>4</sub> -P | Smart Chem wet chemistry analysis                                  | Smart Chem 200 (AMS, Alliance Corp., Westborough, MA, USA)                                                      |
| Chl- <i>a</i>      | UV-Visible Spectrophotometer                                       | AU/Carry 3500 (Agilent technologies, Santa Clara, CA, USA)                                                      |
| TC                 | Membrane filtration method                                         | Vacuum Pressure Pump DOA-P704-AC (GAST Corp., USA)<br>Incubator VS-31258Bi (VISION Scientific, South Korea)     |

Units (mg/L), except pH, WT (°C), EC (μS/cm), Chl -*a* (mg/m<sup>3</sup>), and TC (CFU/100 mL)

| Table S2. Reference range for water quality parameters for RTWQI calculation. |       |                                                                                                                                                                          |
|-------------------------------------------------------------------------------|-------|--------------------------------------------------------------------------------------------------------------------------------------------------------------------------|
| Parameter                                                                     | Unit  | Water quality reference range                                                                                                                                            |
| WT                                                                            | °C    | $(\text{Mean month for 10 years} - 10\text{ }^{\circ}\text{C}) \leq \text{WT} \leq (\text{Mean month for 10 years} + 10\text{ }^{\circ}\text{C})$                        |
| pH                                                                            | –     | $6.5 \leq \text{pH} \leq 9.0$                                                                                                                                            |
| EC                                                                            | µS/cm | $\text{EC} \leq 200\text{ }\mu\text{S/cm}$                                                                                                                               |
| DO                                                                            | mg/L  | $0.8 \times \text{DO (Saturation concentration at current temperature)} \leq \text{DO}$<br>$\leq 1.3 \times \text{DO (Saturation concentration at current temperature)}$ |
| TSS                                                                           | mg/L  | $\text{TSS} \leq 5.0\text{ mg/L}$                                                                                                                                        |
| TOC                                                                           | mg/L  | $\text{TOC} \leq 3.0\text{ mg/L}$                                                                                                                                        |
| TN                                                                            | mg/L  | $\text{TN} \leq 3.0\text{ mg/L}$                                                                                                                                         |
| TP                                                                            | mg/L  | $\text{TP} \leq 0.1\text{ mg/L}$                                                                                                                                         |

**Table S3.** Descriptive statistics of RTWQI.

| Sites   | RTWQI |        |     |      |           |
|---------|-------|--------|-----|------|-----------|
|         | Min   | Median | Max | Mean | Rating    |
| PD1     | 54    | 78     | 90  | 79   | Good      |
| PD2     | 65    | 86     | 100 | 85   | Excellent |
| PD3     | 54    | 77     | 90  | 77   | Good      |
| PD4     | 78    | 100    | 100 | 95   | Excellent |
| PD5     | 45    | 66     | 89  | 66   | Good      |
| Overall | 45    | 79     | 100 | 81   | Excellent |

**Table S4.** Mean values of physicochemical and biological parameters in different seasons in the PDR.

| Parameter          | DS                                                                             | WS                             | F       | Sig.  |
|--------------------|--------------------------------------------------------------------------------|--------------------------------|---------|-------|
| WT                 | 11.9 <sup>a</sup> ± 6.4 <sup>b</sup><br>(2.2 <sup>c</sup> –25.5 <sup>d</sup> ) | 23.7 ± 2.2<br>(18.9–29.9)      | 246.582 | 0.000 |
| pH                 | 8.0 ± 0.4<br>(6.7–9.7)                                                         | 7.8 ± 0.4<br>(18.9–29.9)       | 18.023  | 0.000 |
| EC                 | 246 ± 63<br>(116–389)                                                          | 213 ± 58<br>(101–381)          | 15.197  | 0.000 |
| DO                 | 11.4 ± 1.7<br>(6.9–14.4)                                                       | 8.8 ± 1.3<br>(4.3–12.5)        | 144.378 | 0.000 |
| Transparency       | 1.8 ± 0.8<br>(0.6–4.8)                                                         | 1.2 ± 0.5<br>(0.4–2.7)         | 36.155  | 0.000 |
| BOD                | 1.4 ± 0.7<br>(0.4–3.7)                                                         | 1.5 ± 0.6<br>(0.4–3.2)         | 1.076   | 0.301 |
| COD                | 3.9 ± 0.8<br>(2.7–7.2)                                                         | 4.6 ± 0.9<br>(3.0–7.1)         | 30.677  | 0.000 |
| TOC                | 2.2 ± 0.5<br>(1.5–3.8)                                                         | 2.6 ± 0.5<br>(1.9–4.0)         | 26.936  | 0.000 |
| TSS                | 5.1 ± 3.0<br>(1.0–18.9)                                                        | 9.7 ± 7.5<br>(2.4–43.4)        | 53.093  | 0.000 |
| TN                 | 2.469 ± 0.577<br>(1.343–4.007)                                                 | 2.240 ± 0.453<br>(1.399–3.208) | 9.677   | 0.002 |
| NH <sub>3</sub> -N | 0.062 ± 0.056<br>(0.005–0.350)                                                 | 0.040 ± 0.029<br>(0.008–1.555) | 10.515  | 0.001 |
| NO <sub>3</sub> -N | 2.067 ± 0.481<br>(0.791–3.148)                                                 | 1.828 ± 0.427<br>(0.779–2.649) | 14.308  | 0.000 |
| TP                 | 0.030 ± 0.015<br>(6.7–9.7)                                                     | 0.061 ± 0.034<br>(0.017–0.188) | 108.833 | 0.000 |
| PO <sub>4</sub> -P | 0.006 ± 0.007<br>(0.001–0.039)                                                 | 0.021 ± 0.019<br>(0.001–0.074) | 93.925  | 0.000 |
| Chl- <i>a</i>      | 14.5 ± 10.7<br>(0.5–52.2)                                                      | 19.4 ± 13.3<br>(1.1–67.5)      | 10.278  | 0.002 |
| TC                 | 252 ± 1,151<br>(1–15,000)                                                      | 1,554 ± 2,755<br>(6–17,000)    | 30.564  | 0.000 |

<sup>a</sup>Mean; <sup>b</sup>Standard deviation; <sup>c</sup>Minimum; <sup>d</sup>Maximum.

Units (mg/L), except pH, WT (°C), EC (µS/cm), Chl-*a* (mg/m<sup>3</sup>), and TC (CFU/100 mL)

ANOVA for water quality parameters for stations and seasons at  $p < 0.05$  (Turkey test).

---

**Table S5.** Results of principal component analysis of normalized data: total variance explained.

| Component | Initial Eigenvalues |               |              | Rotation Sums of Squared Loadings |               |              |
|-----------|---------------------|---------------|--------------|-----------------------------------|---------------|--------------|
|           | Total               | % of Variance | Cumulative % | Total                             | % of Variance | Cumulative % |
| 1         | 5.379               | 33.621        | 33.621       | 4.268                             | 26.674        | 26.674       |
| 2         | 3.648               | 22.799        | 56.420       | 3.531                             | 22.069        | 48.743       |
| 3         | 2.586               | 16.162        | 72.582       | 2.819                             | 17.617        | 66.359       |
| 4         | 0.135               | 7.093         | 79.675       | 2.131                             | 13.316        | 79.675       |
